# Supplementary material for: p53 isoform expression promotes a stemness phenotype and inhibits doxorubicin sensitivity in breast cancer
Source: PubMed Central journal article supplement (PMC10409720; doi:10.1038/s41419-023-06031-4), 2023-08-08

Figure 3C

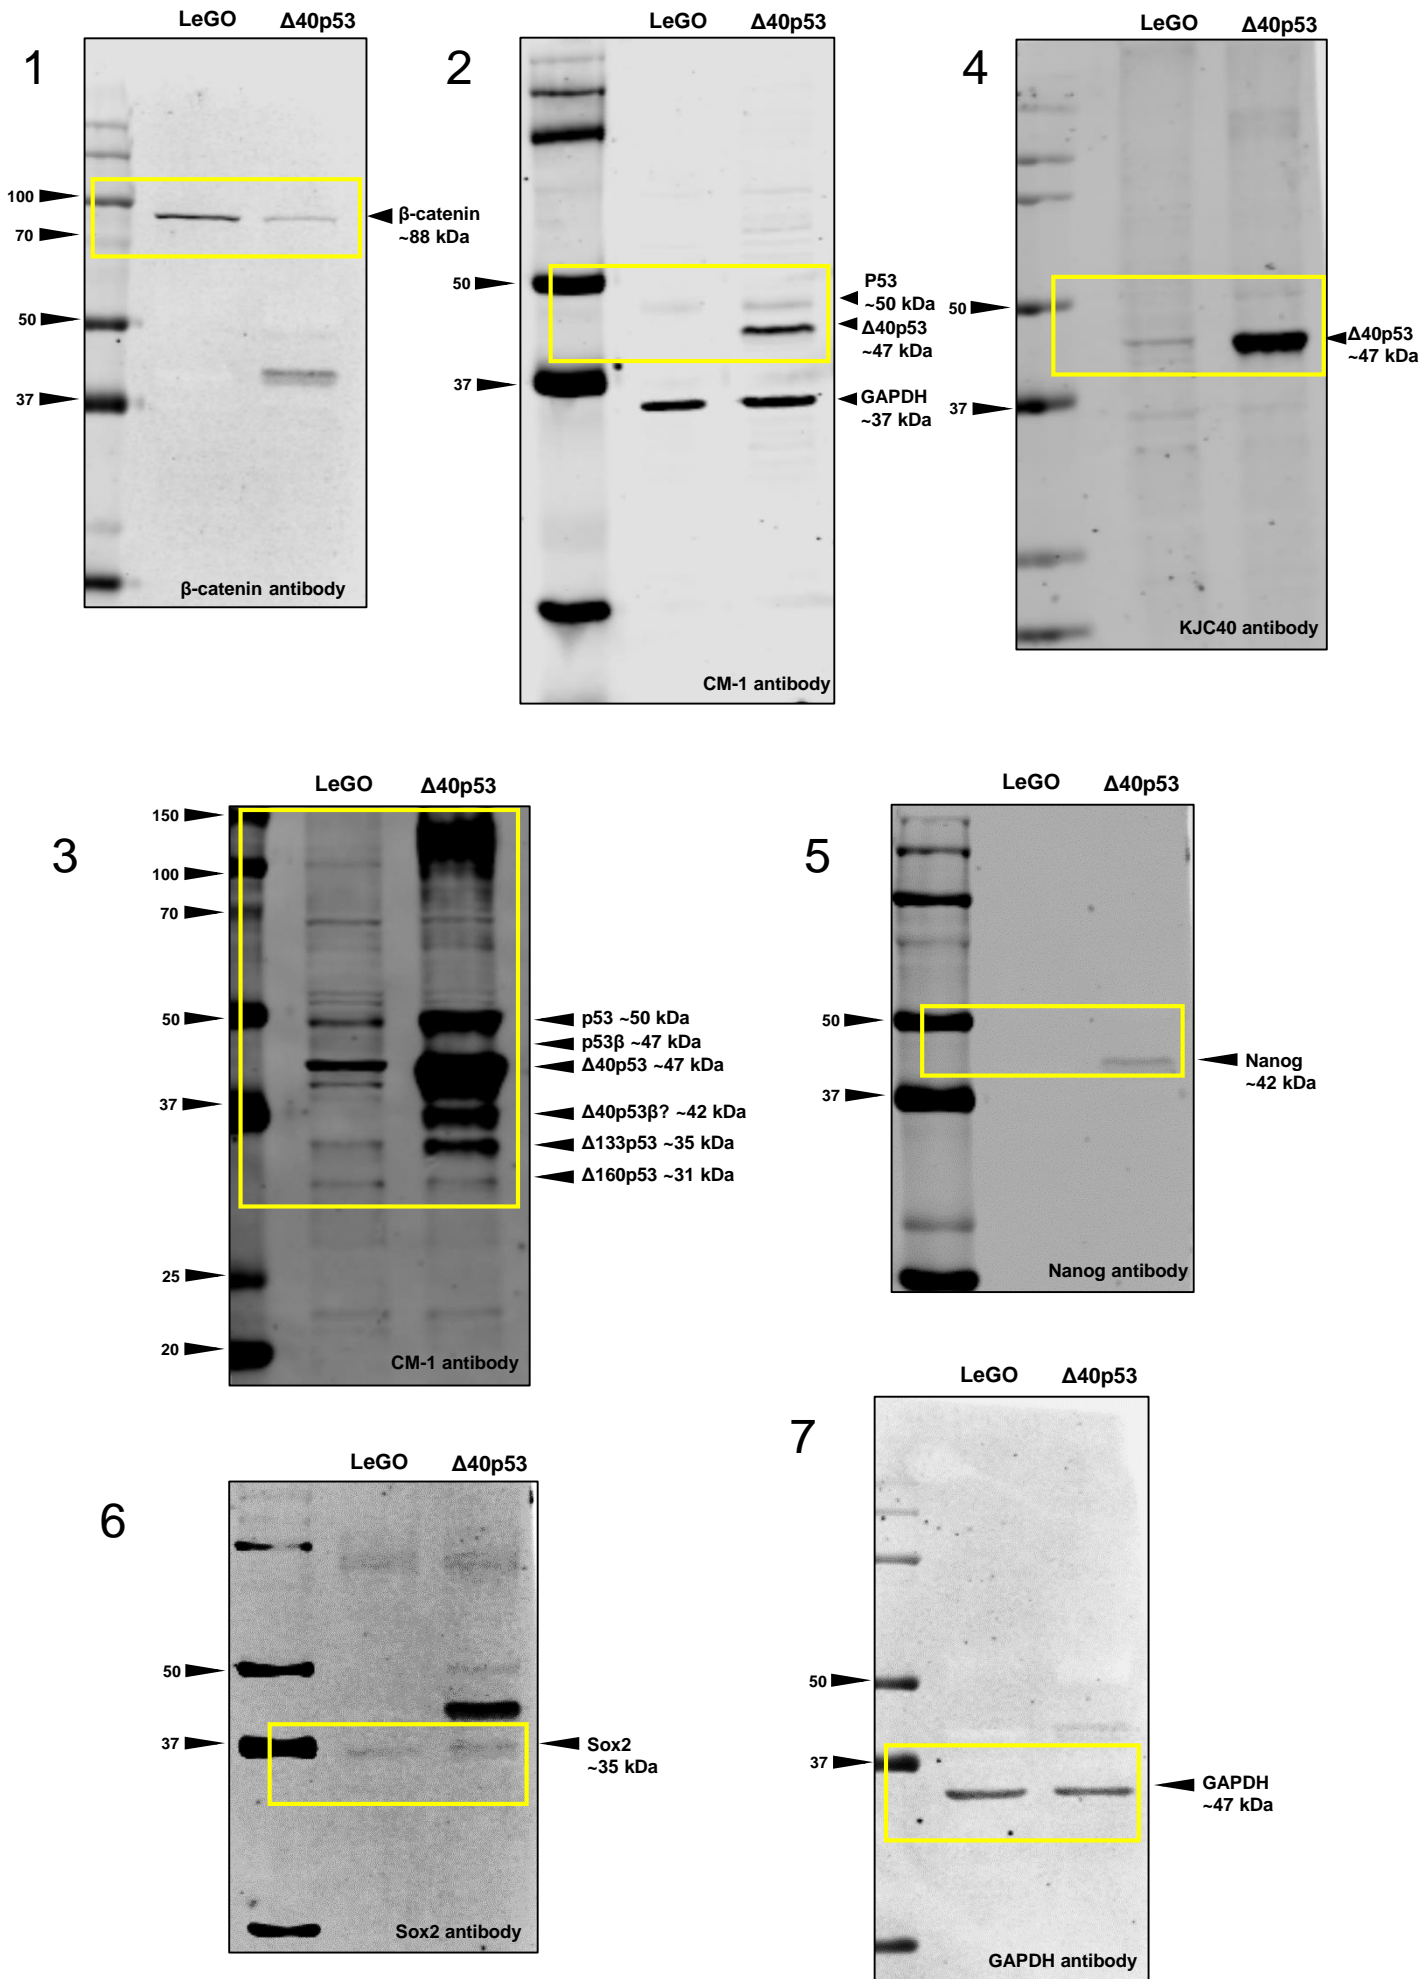

Figure 4B

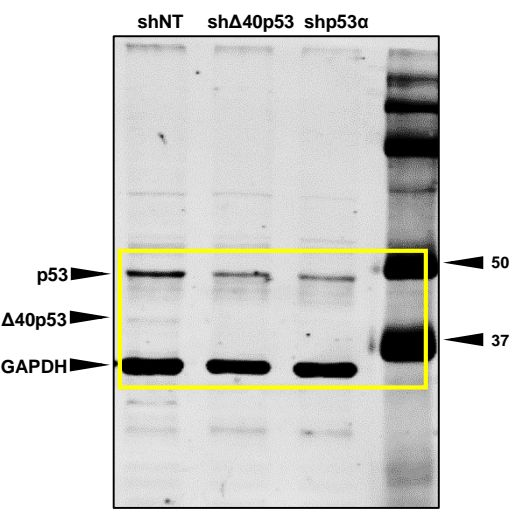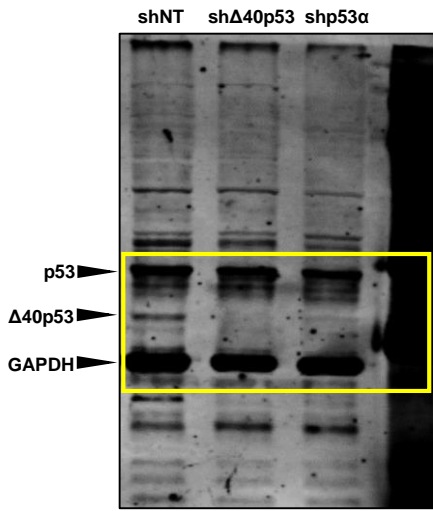

Figure 7A

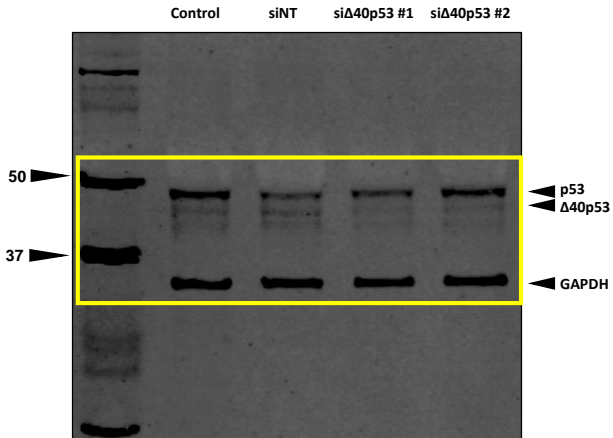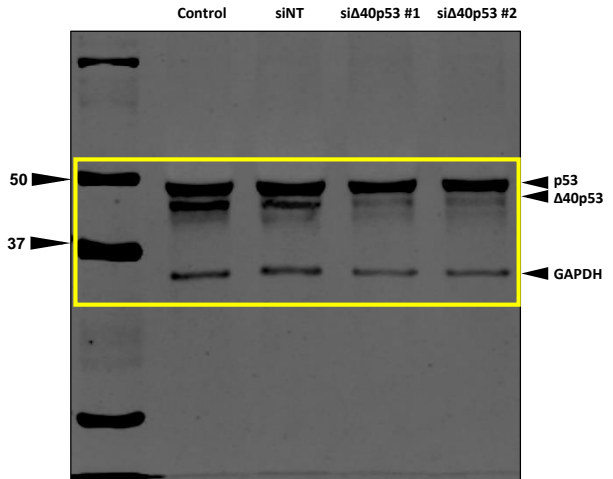

Supplement: 41419_2023_6031_MOESM1_ESM.pdf [file 41419_2023_6031_MOESM1_ESM.pdf]
